# Supplementary material for: Understanding pneumococcal serotype 1 biology through population genomic analysis
Source: PubMed Central journal article supplement (PMC5100261; doi:10.1186/s12879-016-1987-z), 2016-11-08
Supplement: 12879_2016_1987_MOESM12_ESM.pdf [file 12879_2016_1987_MOESM12_ESM.pdf]

# Strain ERS194295

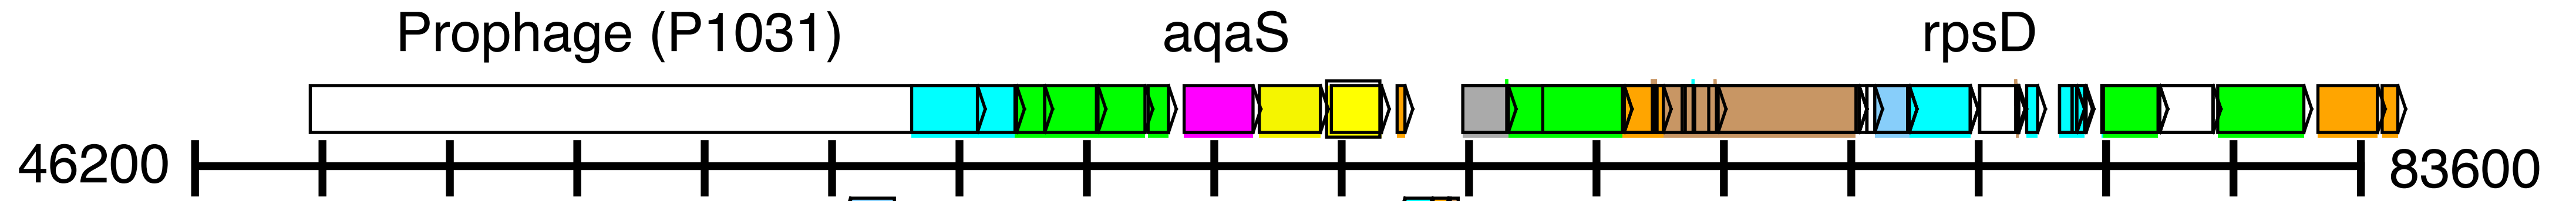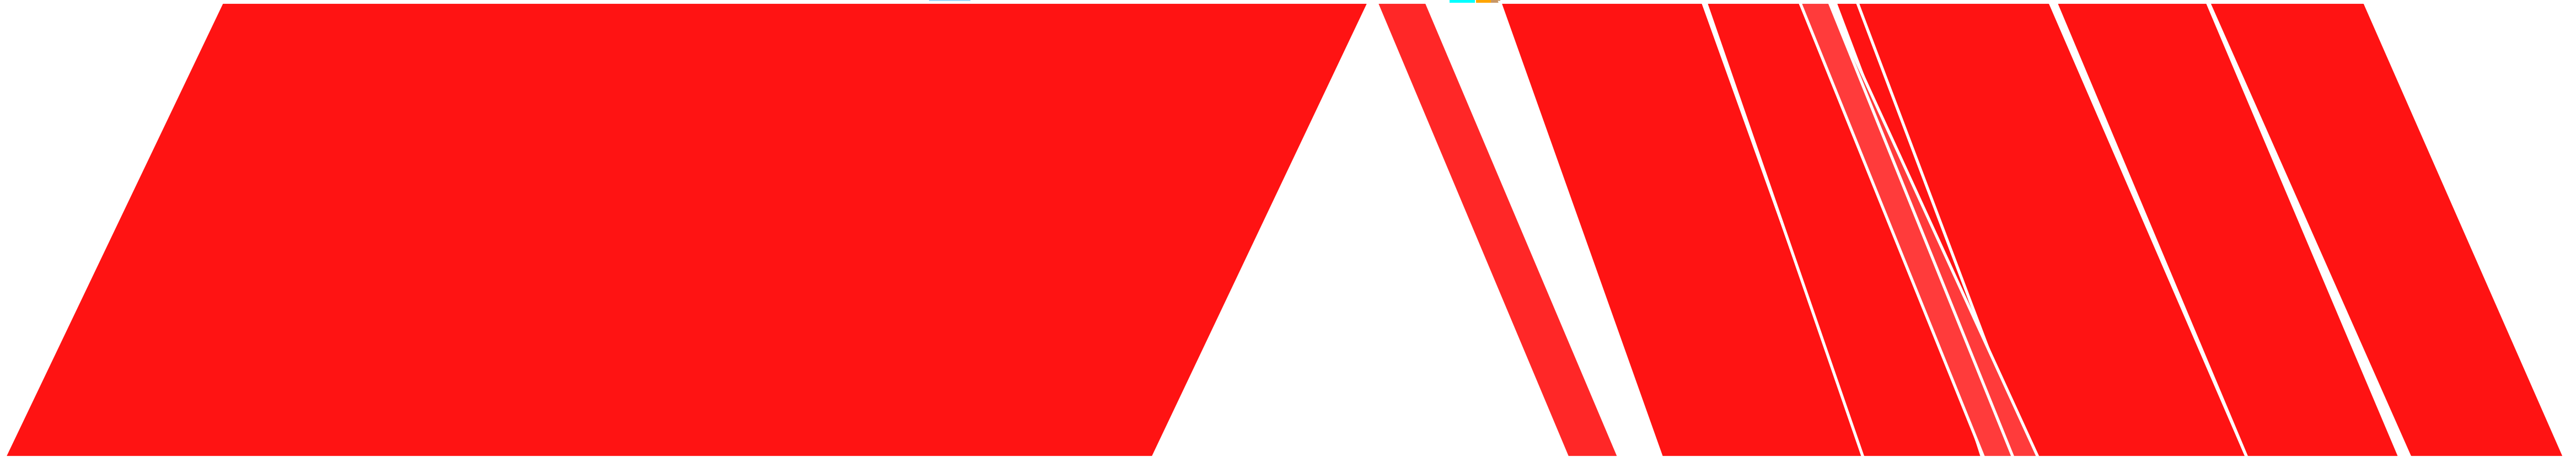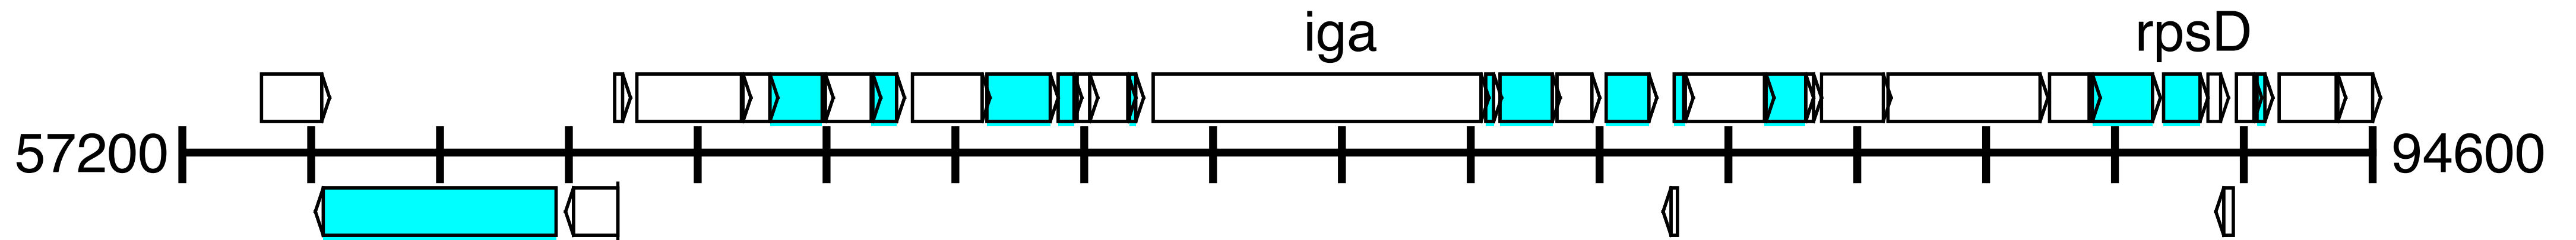

TIGR4
