# Supplementary material for: Understanding pneumococcal serotype 1 biology through population genomic analysis
Source: Springer Nature journal article supplement (doi:10.1186/s12879-016-1987-z), 2016-11-08

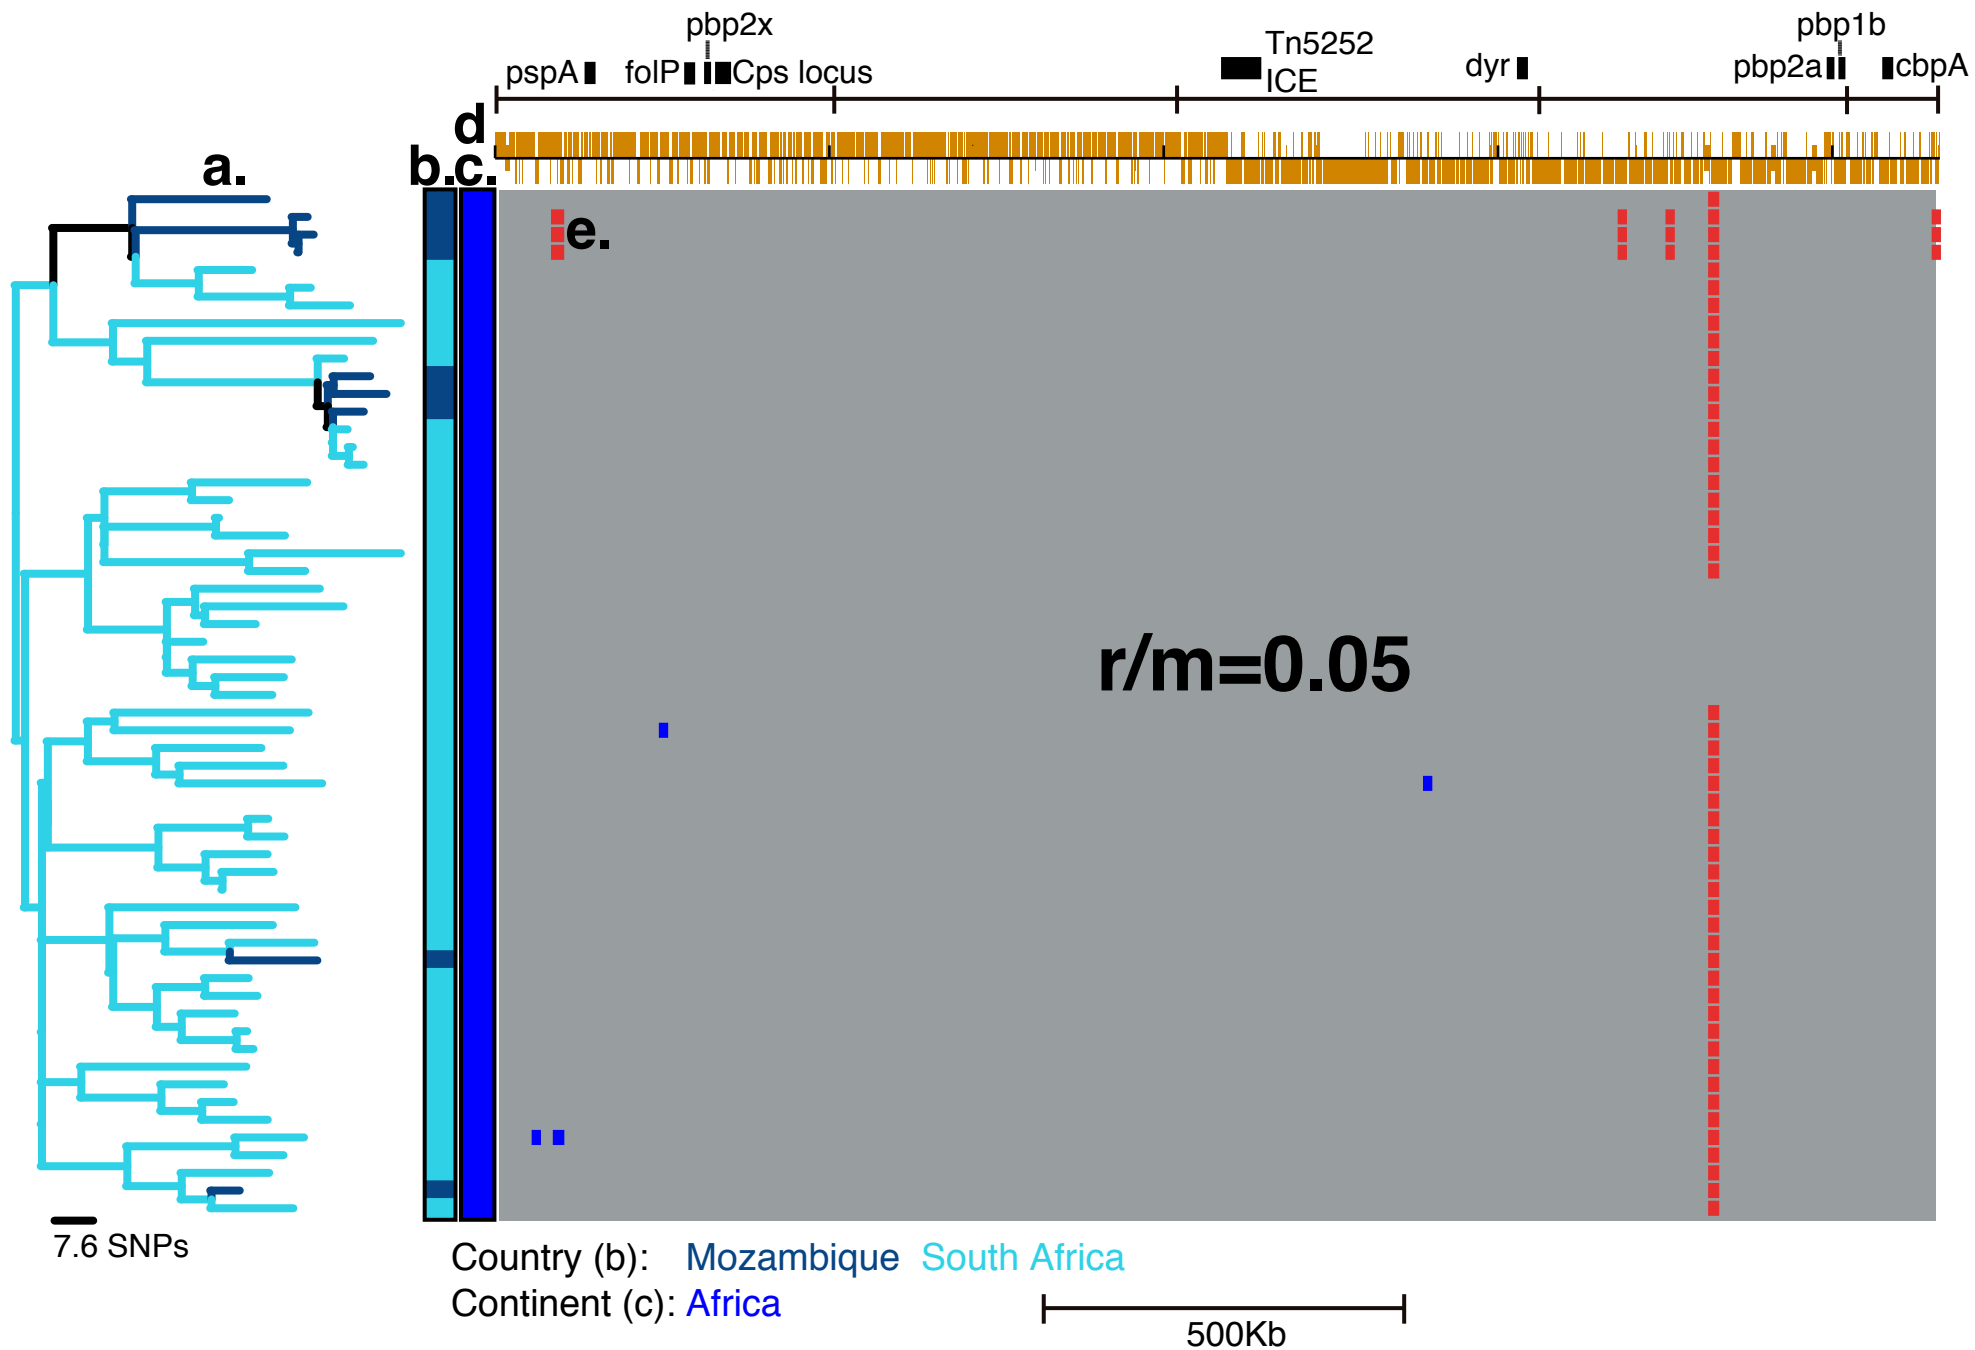

Supplement: MOESM4 [file 11029060]
