# Supplementary material for: Understanding pneumococcal serotype 1 biology through population genomic analysis
Source: Springer Nature journal article supplement (doi:10.1186/s12879-016-1987-z), 2016-11-08
Supplement: MOESM11 [file 11029060]

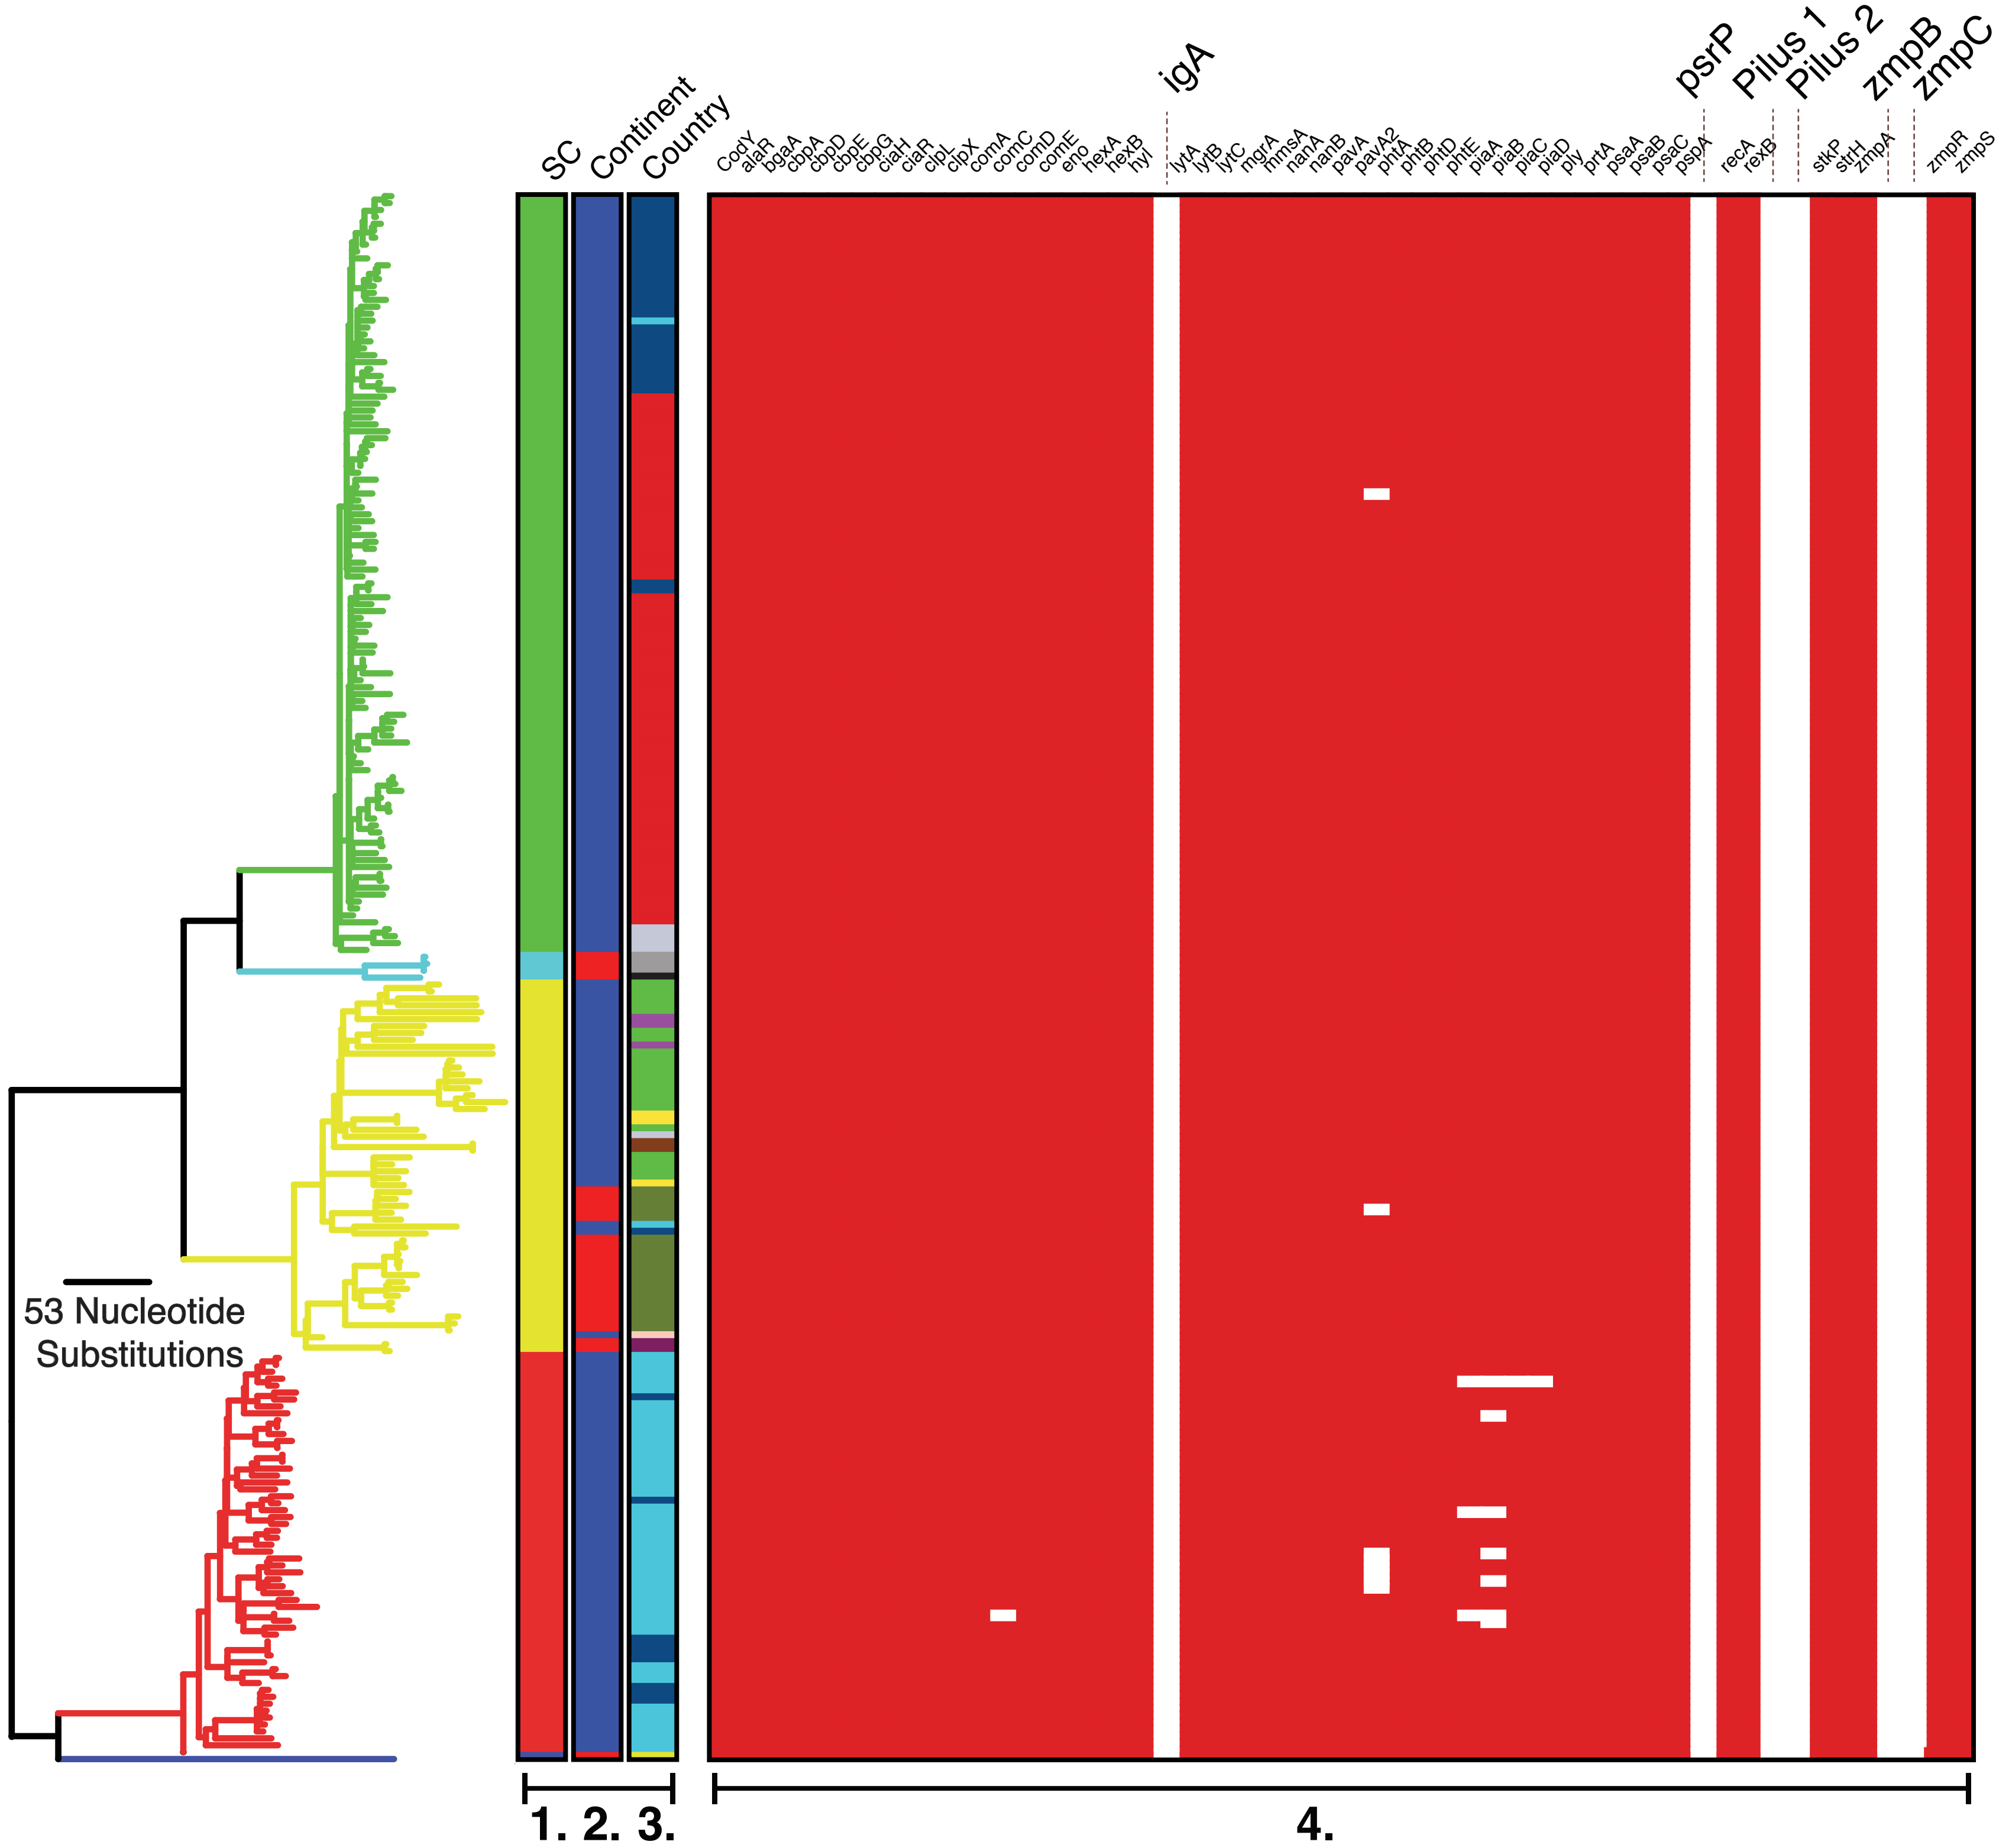

**1. Sequence Cluster (SC)**

- SC1-SA
- SC2-WA
- SC3-SEA
- SC4-AS
- SC5-AS

**2. Continent**

- Africa
- Asia

**3. Country**

- Africa
  - Egypt
  - Ethiopia
  - Ghana
  - South Africa
  - Malawi
  - Mozambique
  - Niger
  - The Gambia
  - Nigeria
- Asia
  - Thailand
  - Qatar
  - India
  - Philippines

**4. Pneumococcal Genes**

- Present
- Absent

SC Continent Country

Cody, alarP, bgaA, cbpA, cbpD, cbpE, cbpG, ciaH, ciaR, cipl, cpx, comA, comC, comD, comE, ero, hexA, hexB, hyl, iga, lytA, lytB, lytC, mgrA, hmra, nana, nanB, pavA, pavA2, pntA, pntB, pntD, pntE, piaA, piaB, piaC, piaD, ply, prtA, psaA, psab, psac, pspa, psrP, recA, recB, Pilus 1, Pilus 2, stkP, strH, zmpA, zmpB, zmpC, zmpR, zmpS

1. 2. 3.

4.

53 Nucleotide Substitutions
